# Supplementary material for: Two unusual binodal highly-connected 3D networks constructed with mutiflexible ligands
Source: Royal Society of Chemistry journal article supplement (doi:10.1039/c1ce05259d), 2011-01-01
Supplement: c1ce05259d.pdf [file c1ce05259d.pdf]

(i) TGA graphics

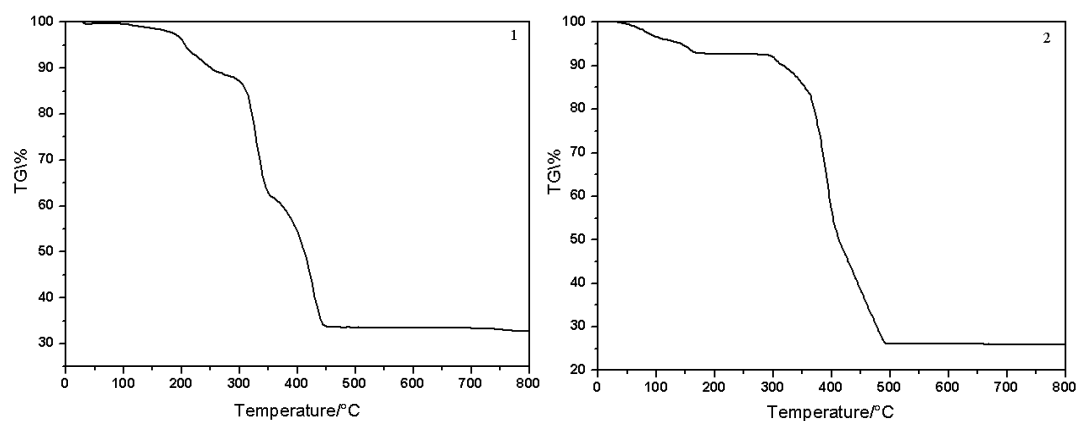

Figures. S1~S2 TGA curves for **1** and **2**, respectively.

(ii) long symbol: [3.4.4.4.4.4][3.3.3.3.4.4.4.4.4.4.4.4.4.4.5.5.5.5.2.5.2.5.2.5.2.5.4.5.4.6.2.6.2.6.2.6.4.6.4.6.4.6.4.6.4.7.8.7.8.4.4.6.2.6.2.6.2.6.2.7.4.7.8.7.16.8.8.8.24] for compound **1** and [4.4.4]<sub>2</sub>[4.4.4.4.4.4.4.4.4.4.6.2.6.2.6.2.6.2.6.4.6.4.6.4.6.4.6.4.6.4.6.4.6.4.6.4.6.4.6.4.6.4.6.4.6.4.6.4.6.8.6.8.6.8.6.8.6.8.6.8.6.12.6.12.6.12.6.12.8.20.8.20] for compound **2**, respectively.
